# Supplementary material
Source: PubMed Central journal article supplement (PMC7739375)
Supplement: NIHMS1649749-supplement-Supplementary_Information.pdf [file NIHMS1649749-supplement-Supplementary_Information.pdf]

# SUPPORTING INFORMATION

## **Orthophosphate Interactions with Destabilized PbO<sub>2</sub> Scales**

\*Michael K. DeSantis<sup>1</sup>, Michael R. Schock<sup>1</sup>, Jennifer Tully<sup>1</sup>, and Christina Bennett-Stamper<sup>1</sup>

<sup>1</sup>U.S. Environmental Protection Agency, Center for Environmental Solutions and Emergency Response, Water Infrastructure Division, 26 W. Martin Luther King Dr., Cincinnati, OH 45268

18 Pages

6 Tables

7 Figures

Methods

2 Lead Service Line (LSL) Scale Descriptions

References

**Table S1. Treatment change timeline and operation highlights for Utility A**

|                                  |                       | 1992                 | 1993                              | 1994                                                     | 1995                                   | 1996                                   | 1997                                                                                                 | 1998                                                                                      | 1999 | 2000                                                                 | 2002                                                                 | 2003                                        | 2004                                                                                                                                                                                                                                                    | 2005                                                 |
|----------------------------------|-----------------------|----------------------|-----------------------------------|----------------------------------------------------------|----------------------------------------|----------------------------------------|------------------------------------------------------------------------------------------------------|-------------------------------------------------------------------------------------------|------|----------------------------------------------------------------------|----------------------------------------------------------------------|---------------------------------------------|---------------------------------------------------------------------------------------------------------------------------------------------------------------------------------------------------------------------------------------------------------|------------------------------------------------------|
| <b>Corrosion Control Studies</b> |                       |                      |                                   | Submitted CC study to Region                             |                                        |                                        | Conditional OCCT designation to use pH adjustment. Utility to assess feasibility of alternative CCTs |                                                                                           |      | Designated pH adjustment as OCCT, minimum pH of 7.7 to be maintained | Region changed the minimum pH at DS sample locations from 7.7 to 7.0 |                                             |                                                                                                                                                                                                                                                         |                                                      |
| <b>Corrosion Control</b>         | <b>pH/ Alkalinity</b> |                      |                                   | Annual system average pH 8.0                             |                                        |                                        |                                                                                                      | Average DS pH 7.8 with a range of 7.0-8.7 (seasonal variability, lows of 7.0-7.2 to >8.5) |      |                                                                      | pH 7.7-8.5, alkalinity 43-115 mg/L CaCO <sub>3</sub>                 | pH 7.7-8.4, 47-83 mg/L CaCO <sub>3</sub>    | pH 7.6-8.5, alkalinity 52-90 mg/L CaCO <sub>3</sub>                                                                                                                                                                                                     | pH 7.2-8.2, alkalinity 33-109 mg/L CaCO <sub>3</sub> |
|                                  | <b>Inhibitor</b>      |                      |                                   |                                                          |                                        |                                        |                                                                                                      |                                                                                           |      |                                                                      |                                                                      |                                             | <b>Orthophosphate</b><br>June: Started partial system application<br>August: Full system application, DS residual ND-3.23 mg PO <sub>4</sub> /L<br>2005 Average 3.0<br>2006 Average: 2.6<br>2007 Average: 2.3<br>2008 Average: 2.3<br>2009 Average: 2.1 |                                                      |
| <b>Disinfection</b>              | <b>Chlorine</b>       | EP Residual 1-2 mg/L | EP Residual increased to 2-4 mg/L |                                                          | EP Residual maintained around 2-4 mg/L | EP Residual reduced to around 2-3 mg/L |                                                                                                      | EP Residual maintained around 2-3 mg/L                                                    |      |                                                                      |                                                                      |                                             |                                                                                                                                                                                                                                                         |                                                      |
|                                  | <b>Chloramine</b>     |                      |                                   |                                                          |                                        |                                        |                                                                                                      |                                                                                           |      | November: Chloramination begins                                      | NH <sub>2</sub> Cl DS residual 3.4-3.7 mg/L                          | NH <sub>2</sub> Cl DS residual 3.5-3.8 mg/L | NH <sub>2</sub> Cl DS residual 3.3-3.8 mg/L                                                                                                                                                                                                             |                                                      |
| <b>Other</b>                     | <b>Regulations</b>    | Lead ALE             | Lead ALE and violated TCR         | Violated turbidity requirements of the SWTR and lead ALE | Violated TCR                           |                                        |                                                                                                      |                                                                                           |      |                                                                      | Lead ALE                                                             |                                             |                                                                                                                                                                                                                                                         |                                                      |

CC- Corrosion Control  
 OCCT- Optimal Corrosion Control Treatment  
 CCT- Corrosion Control Treatment  
 DS-Distribution System

EP- Entry Point  
 ND- Non-detect  
 ALE- Action Level Exceedance  
 TCR- Total Coliform Rule

SWTR- Surface Water Treatment Rule

**Table S2. 90<sup>th</sup> Percentile Lead (mg/L) Results by Utility**

| Monitoring Period | 1992         | 1993     |              | 1994     |          | 1997          |          | 2000  | 2001         | 2002         | 2003        |              | 2004         |              | 2005         |              | 2006     |          | 2007     |              | 2008     |          |
|-------------------|--------------|----------|--------------|----------|----------|---------------|----------|-------|--------------|--------------|-------------|--------------|--------------|--------------|--------------|--------------|----------|----------|----------|--------------|----------|----------|
|                   |              | Jan-June | July-Dec     | Jan-June | July-Dec | Jan-June      | July-Dec |       |              |              | Jan-June    | July-Dec     | Jan-June     | July-Dec     | Jan-June     | July-Dec     | Jan-June | July-Dec | Jan-June | July-Dec     | Jan-June | July-Dec |
| Utility A         | <b>0.039</b> | 0.012    | <b>0.028</b> | 0.014    | 0.012    | 0.006         | 0.008    | 0.012 | <b>0.035</b> | <b>0.075</b> | <b>0.04</b> | <b>0.063</b> | <b>0.059</b> | <b>0.054</b> | <b>0.015</b> | <b>0.015</b> | 0.01     | 0.012    | 0.01     | 0.011        | 0.007    | 0.008    |
| Utility B         | <b>0.028</b> |          |              |          |          | <b>0.023*</b> |          |       | 0.012        |              |             |              | 0.014        |              |              |              |          |          | 0.013    | <b>0.026</b> | 0.012    | 0.006    |

90<sup>th</sup> Percentile Pb results recorded in mg/L

\*Estimated from historical records

Blanks indicate no data available, **bold values** indicate a result above the 90<sup>th</sup> percentile lead action level of 0.015 mg/L.

**Table S3. Treatment change timeline and operation highlights for Utility B**

|                   |           | Spring 1997                                                                                       | September 2000                                                           | February 2001                                   | June 2001                                       | May 2002         | January 2004                                                     | 2005                                                                                  | 2006                                                                                           | 2007                                                                                                                         | 2008                                                                                                                                                         |
|-------------------|-----------|---------------------------------------------------------------------------------------------------|--------------------------------------------------------------------------|-------------------------------------------------|-------------------------------------------------|------------------|------------------------------------------------------------------|---------------------------------------------------------------------------------------|------------------------------------------------------------------------------------------------|------------------------------------------------------------------------------------------------------------------------------|--------------------------------------------------------------------------------------------------------------------------------------------------------------|
| Corrosion Control | pH        | Plant effluent pH 7.5, using lime                                                                 |                                                                          |                                                 |                                                 | Switched to NaOH |                                                                  | Target pH of 8.0                                                                      | Target pH of 8.0-8.4                                                                           | Target pH of 7.7                                                                                                             | Target pH of 7.7                                                                                                                                             |
|                   | Inhibitor | Started orthophosphate feed at 3.5 mg PO <sub>4</sub> /L                                          |                                                                          | Reduced dosage to 3.5-2.5 mg PO <sub>4</sub> /L | Reduced dosage to 2.5-2.0 mg PO <sub>4</sub> /L |                  |                                                                  | Maintained dose at 2.0 mg PO <sub>4</sub> /L                                          | Maintained 2.0 mg PO <sub>4</sub> /L                                                           | Maintained 2.0 mg PO <sub>4</sub> /L                                                                                         | Maintained 2.0 mg PO <sub>4</sub> /L                                                                                                                         |
| Disinfection      | Chlorine  | Gaseous Cl <sub>2</sub> dosage range 3-7 mg/L in plant with plant effluent target of 1.5-3.0 mg/L |                                                                          |                                                 |                                                 |                  | Switch from gaseous Cl <sub>2</sub> to NaOCl                     | Average total chlorine distribution system residual 0.76 mg/L (range: 0.00-2.33 mg/L) |                                                                                                |                                                                                                                              |                                                                                                                                                              |
|                   |           |                                                                                                   |                                                                          |                                                 |                                                 |                  |                                                                  |                                                                                       | Chloramine<br>October: chloramination begins (4:1 ratio, 2.0-3.0 mg/L plant effluent residual) | Plant effluent total chlorine residual average 2.21 mg/L (range: 1.03-3.64 mg/L). DS average 1.9 mg/L (range: 0.07-3.8 mg/L) | Plant effluent total chlorine residual average 2.35 mg/L (range: 1.12-3.20 mg/L). DS average 1.87 mg/L (range: 0.00-3.5 mg/L)                                |
|                   |           |                                                                                                   |                                                                          |                                                 |                                                 |                  | UV<br>Started UV disinfection (late 2004)                        | UV disinfection unit was placed into full service in March                            |                                                                                                |                                                                                                                              |                                                                                                                                                              |
| Other             | Coagulant | Alum primary coagulant, dosage range 35-70 mg/L                                                   | Switch to PACL, typical dosage 35-50 mg/L (neat)                         |                                                 |                                                 |                  | Start enhanced coagulation, using high dosage PACL (80-120 mg/L) |                                                                                       |                                                                                                |                                                                                                                              |                                                                                                                                                              |
|                   | Fluoride  | Fluoride at 1.0 mg/L using NaF                                                                    | Switch to H <sub>2</sub> SiF <sub>6</sub> , fluoride ion dosage 1.0 mg/L |                                                 |                                                 |                  |                                                                  | Offline for 189 days                                                                  | Offline all year                                                                               | Offline until June 18th                                                                                                      | Offline since February, will not come back online. Source water has natural background concentration of fluoride (average: 0.10 mg/L, range: 0.06-0.13 mg/L) |

DS- Distribution System

PACL- Polyaluminum Chloride

**Table S4.** Existing phases in the solid solution series between hydroxypyromorphite and hydroxyapatite

| PDF card #  | Formula                                                                                                          | Ca (mol) | d <sub>211</sub> (Å) |
|-------------|------------------------------------------------------------------------------------------------------------------|----------|----------------------|
| 00-024-0586 | Pb <sub>5</sub> (PO <sub>4</sub> ) <sub>3</sub> OH                                                               | 0        | 2.9740               |
| 00-008-0259 | Pb <sub>5</sub> (PO <sub>4</sub> ) <sub>3</sub> OH                                                               | 0        | 2.9650               |
| 04-011-0857 | Pb <sub>5</sub> (PO <sub>4</sub> ) <sub>3</sub> OH                                                               | 0        | 2.9615               |
| 04-010-3163 | Ca <sub>0.805</sub> Pb <sub>4.195</sub> (PO <sub>4</sub> ) <sub>3</sub> OH                                       | 0.805    | 2.9290               |
| 00-040-1495 | Ca <sub>2</sub> Pb <sub>8</sub> (PO <sub>4</sub> ) <sub>6</sub> (OH) <sub>2</sub>                                | 1        | 2.9300               |
| 04-010-3162 | Ca <sub>2.74</sub> Pb <sub>2.26</sub> (PO <sub>4</sub> ) <sub>3</sub> OH                                         | 2.74     | 2.8742               |
| 01-079-0685 | Ca <sub>2.79</sub> Pb <sub>2.21</sub> (PO <sub>4</sub> ) <sub>3</sub> OH                                         | 2.79     | 2.8742               |
| 00-040-1496 | Ca <sub>5.5</sub> Pb <sub>4.5</sub> (PO <sub>4</sub> ) <sub>6</sub> (OH) <sub>2</sub>                            | 2.75     | 2.8740               |
| 04-010-3161 | Ca <sub>3.915</sub> Pb <sub>1.085</sub> (PO <sub>4</sub> ) <sub>3</sub> OH                                       | 3.915    | 2.8364               |
| 01-079-0684 | Ca <sub>3.93</sub> Pb <sub>1.07</sub> (PO <sub>4</sub> ) <sub>3</sub> OH                                         | 3.93     | 2.8364               |
| 00-040-1497 | Ca <sub>8</sub> Pb <sub>2</sub> (PO <sub>4</sub> ) <sub>6</sub> (OH) <sub>2</sub>                                | 4        | 2.8370               |
| 00-047-1758 | Ca <sub>8.78</sub> Pb <sub>1.22</sub> (PO <sub>4</sub> ,CO <sub>3</sub> ) <sub>6</sub> (OH,F,Cl) <sub>2.56</sub> | 4.39     | 2.8000               |
| 00-009-0432 | Ca <sub>5</sub> (PO <sub>4</sub> ) <sub>3</sub> OH                                                               | 5        | 2.8140               |
| 01-074-0565 | Ca <sub>10</sub> (PO <sub>4</sub> ) <sub>6</sub> (OH) <sub>2</sub>                                               | 5        | 2.8147               |

**Table S5.** Detected mineral phases by powder X-Ray Diffraction for each pipe scale layer sampled

| Sample    | Layer | Approximate Thickness (μm) | Plattnerite<br>Pb(IV) | Scrutinyite<br>Pb(IV) | Litharge<br>Pb(II) | Massicot<br>Pb(II) | Hydrocerussite<br>Pb(II) | Plumbonacrite<br>Pb(II) | Ca-Pb phosphates<br>Pb(II) | Pb | Qtz | Amph |
|-----------|-------|----------------------------|-----------------------|-----------------------|--------------------|--------------------|--------------------------|-------------------------|----------------------------|----|-----|------|
| A_prePO4  | L1    | 30-50                      | ++++                  |                       | +                  |                    | ++                       |                         |                            |    |     |      |
|           | L2    | 125                        | ++                    |                       | ++++               |                    | ++                       |                         |                            | D  |     |      |
| A_postPO4 | L1    | 0-100                      | ++++                  |                       | ++                 | ++                 | +                        |                         |                            |    |     | ++   |
|           | L2    | 25                         | ++++                  |                       |                    |                    | +                        |                         |                            |    |     |      |
|           | L3    | 25                         | ++++                  | ++++                  |                    |                    | +++                      |                         | +++                        |    |     |      |
|           | L4a   | 150-170                    | +                     |                       | ++++               |                    | ++                       |                         | +                          |    |     |      |
|           | L4b   |                            |                       |                       | ++++               |                    | +                        |                         |                            | D  |     |      |
| B_area1   | L1    | 400-500                    | +                     |                       |                    |                    |                          |                         |                            |    | D   | ++++ |
|           | L2    | 40                         | ++++                  |                       |                    |                    |                          |                         | ++                         |    |     |      |
|           | L3    | 40                         | +++                   |                       |                    |                    |                          |                         | +++                        |    |     |      |
|           | L4    | 20                         | +++                   |                       | ++++               |                    |                          |                         | +++                        | D  |     |      |
| B_area2   | L1    | 10-30                      | +++                   |                       | ++                 | ++                 | ++                       | ++++                    |                            | D  |     |      |
|           | L2    | 30                         | ++++                  |                       |                    | ++                 | ++                       | ++                      | +                          |    |     |      |
|           | L3    | 20                         | +++                   |                       | ++++               | +                  | +                        | +                       | +                          | D  |     |      |

++++ Major    +++ Moderate    ++ Minor    + Trace    **D** Detected    **Pb** Metallic lead    **Qtz** Quartz    **Amph** Amorphous Component

**Table S6.** ICP-MS results from Utility A LSL Scale Layers

| <b>Utility A LSLs</b>        |              |                  |                  |                  |                 |
|------------------------------|--------------|------------------|------------------|------------------|-----------------|
|                              | <b>Layer</b> | <b>Al (wt %)</b> | <b>Ca (wt %)</b> | <b>Fe (wt %)</b> | <b>P (wt %)</b> |
| <b>Pre-phosphate 1 (n=1)</b> | <b>L1</b>    | <b>1.3</b>       | <b>0.19</b>      | <b>0.6</b>       | <b>&lt;0.1</b>  |
| <b>Pre-phosphate 2 (n=1)</b> | <b>L1</b>    | <b>0.84</b>      | <b>0.15</b>      | <b>0.24</b>      | <b>&lt;0.1</b>  |
| <b>Pre-phosphate 3 (n=1)</b> | <b>L1</b>    | <b>3.6</b>       | <b>0.41</b>      | <b>2.4</b>       | <b>&lt;0.1</b>  |
| <b>A_postPO4 (n=1)</b>       | <b>L1</b>    | <b>2.3</b>       | <b>0.86</b>      | <b>2.3</b>       | <b>0.75</b>     |
| <b>Post-phosphate (n=8)</b>  | <b>L1</b>    | <b>0.6-3.2</b>   | <b>0.9-4.25</b>  | <b>0.6-5.1</b>   | <b>0.9-5.9</b>  |
| <b>Pre-phosphate 2 (n=1)</b> | <b>L2</b>    | <b>0.46</b>      | <b>0.1</b>       | <b>0.14</b>      | <b>&lt;0.1</b>  |
| <b>A_postPO4 (n=1)</b>       | <b>L2</b>    | <b>0.63</b>      | <b>0.88</b>      | <b>0.34</b>      | <b>1.1</b>      |
| <b>Post-phosphate (n=9)</b>  | <b>L2</b>    | <b>0.08-1.9</b>  | <b>0.6-4.8</b>   | <b>0.1-1.1</b>   | <b>0.8-5</b>    |
| <b>A_postPO4 (n=1)</b>       | <b>L3</b>    | <b>0.1</b>       | <b>0.5</b>       | <b>0.01</b>      | <b>0.58</b>     |
| <b>Post-phosphate (n=9)</b>  | <b>L3</b>    | <b>0.03-0.4</b>  | <b>0.2-1.7</b>   | <b>0.01-0.08</b> | <b>0.3-3.6</b>  |

"<" indicates result was less than the detection limit

Figure S1: Application of Vegard's Law using the phases identified in Table S4

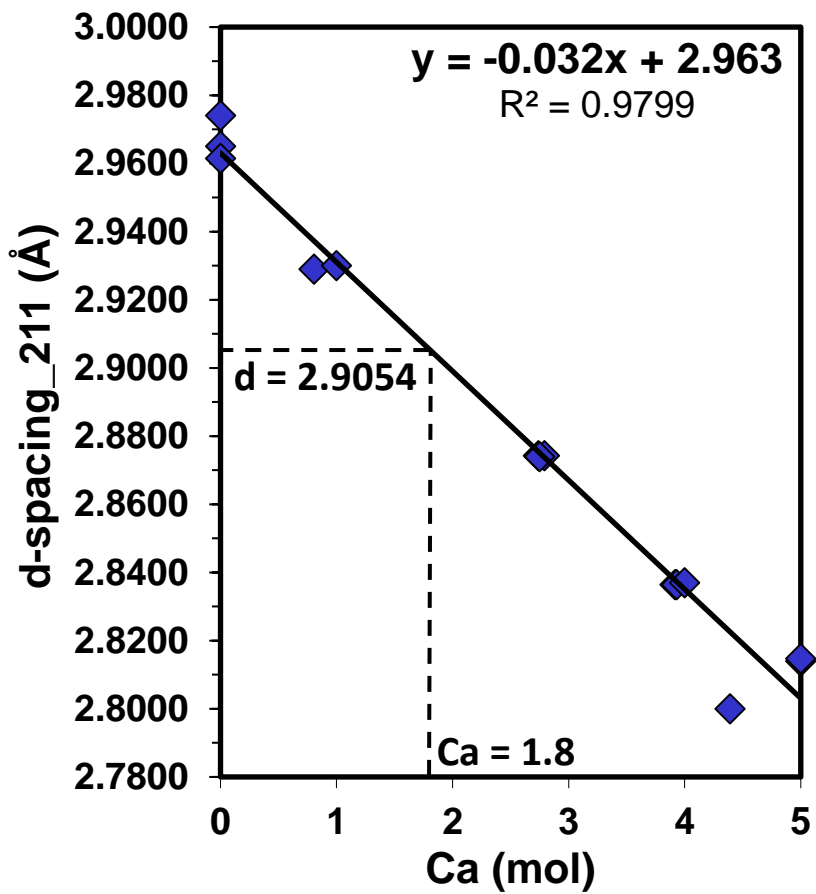



Figure S2. Close-up photographs of Utility A pipes: A) A\_prePO4 B) A\_postPO4. Scale bar in mm.

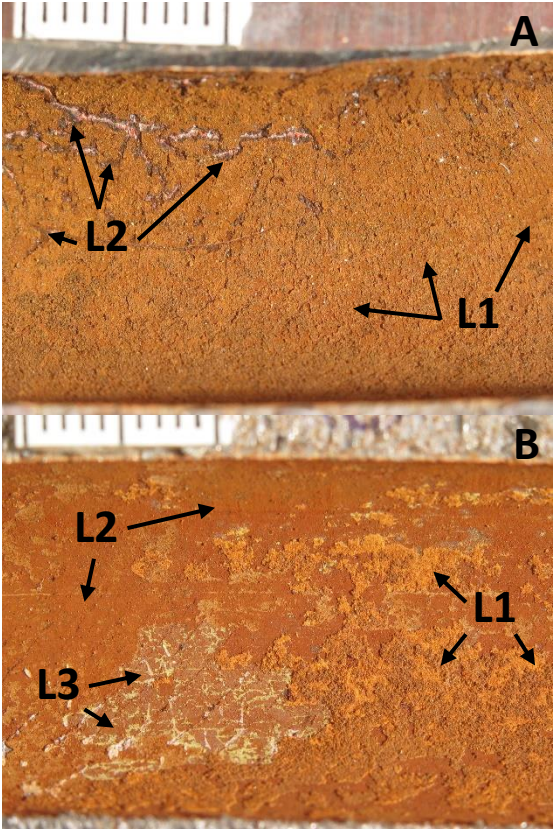

**Figure S3.** Utility A PXRD patterns for layers sampled from pipe A\_postPO4. Numbered phases indicate the location of diffraction lines for the individual compounds identified

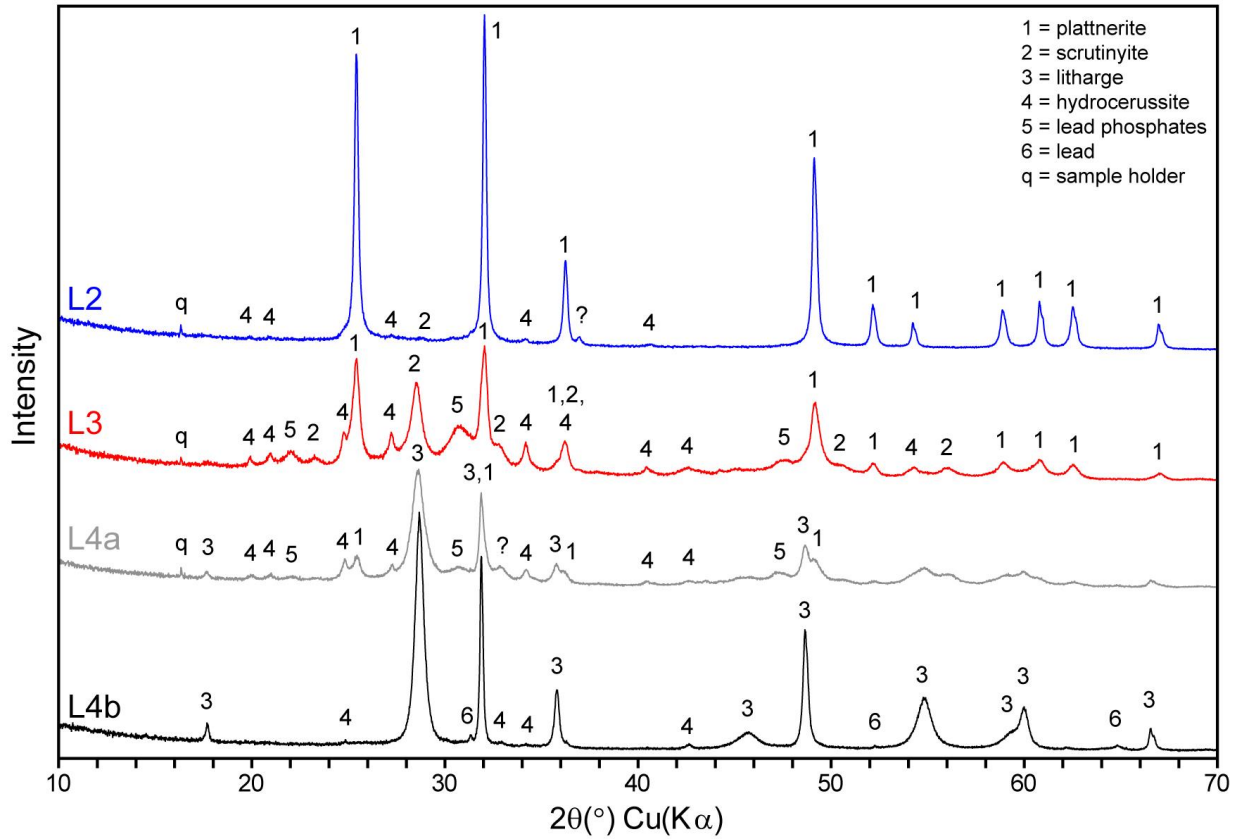

**Figure S4.** Macrophotography of the received LSL from Utility B. A) Close-up image of the transition from area 1 to area 2, scale bar in mm. B) Close-up image of the various scale layers sampled from area 1, scale bar = 100  $\mu$ m. C) Close-up image of the scale in area 2, scale bar in mm. D) Close-up image showing scale layers L1 and L2 from area 2, scale bar = 100  $\mu$ m.

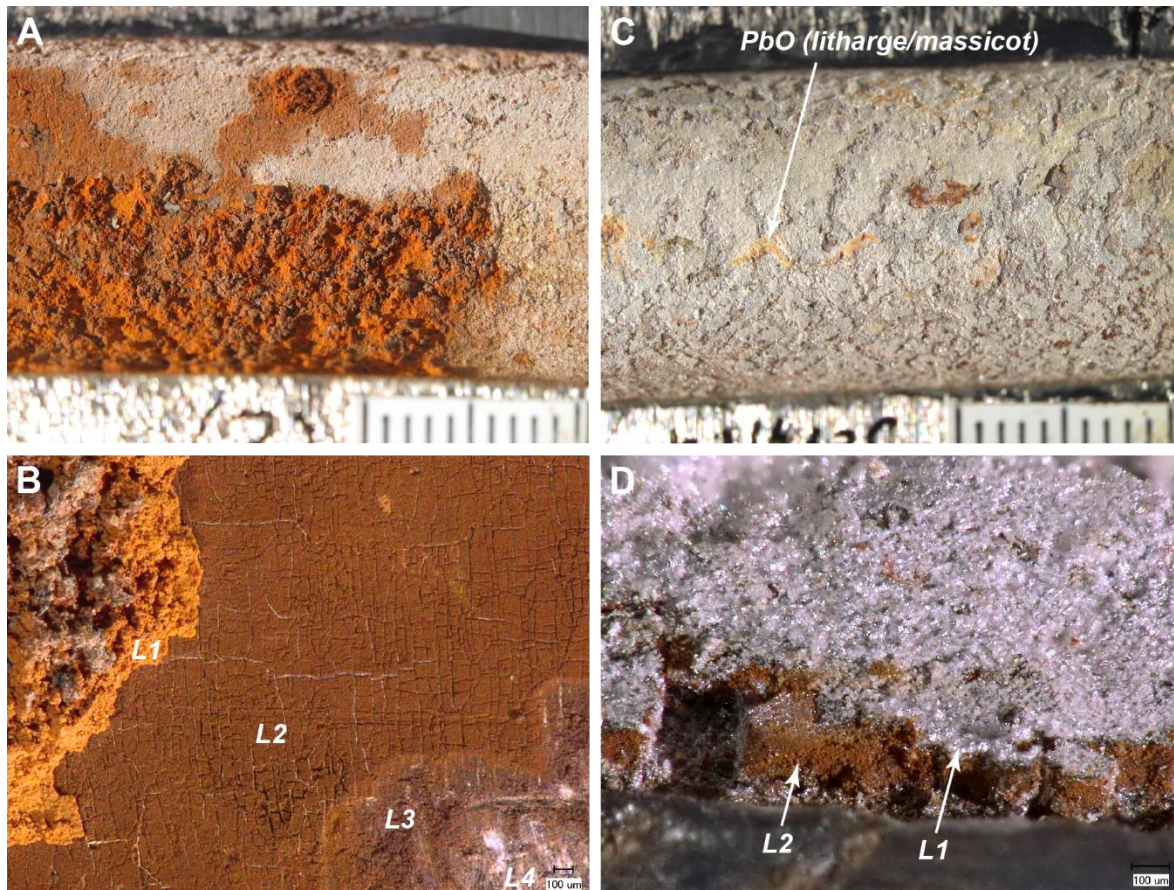

**Figure S5.** PXRD patterns for LSL layers L1-L5 in Utility C. Note the dominance of plattnerite in L4 and the Ca-Pb phosphate in L5.

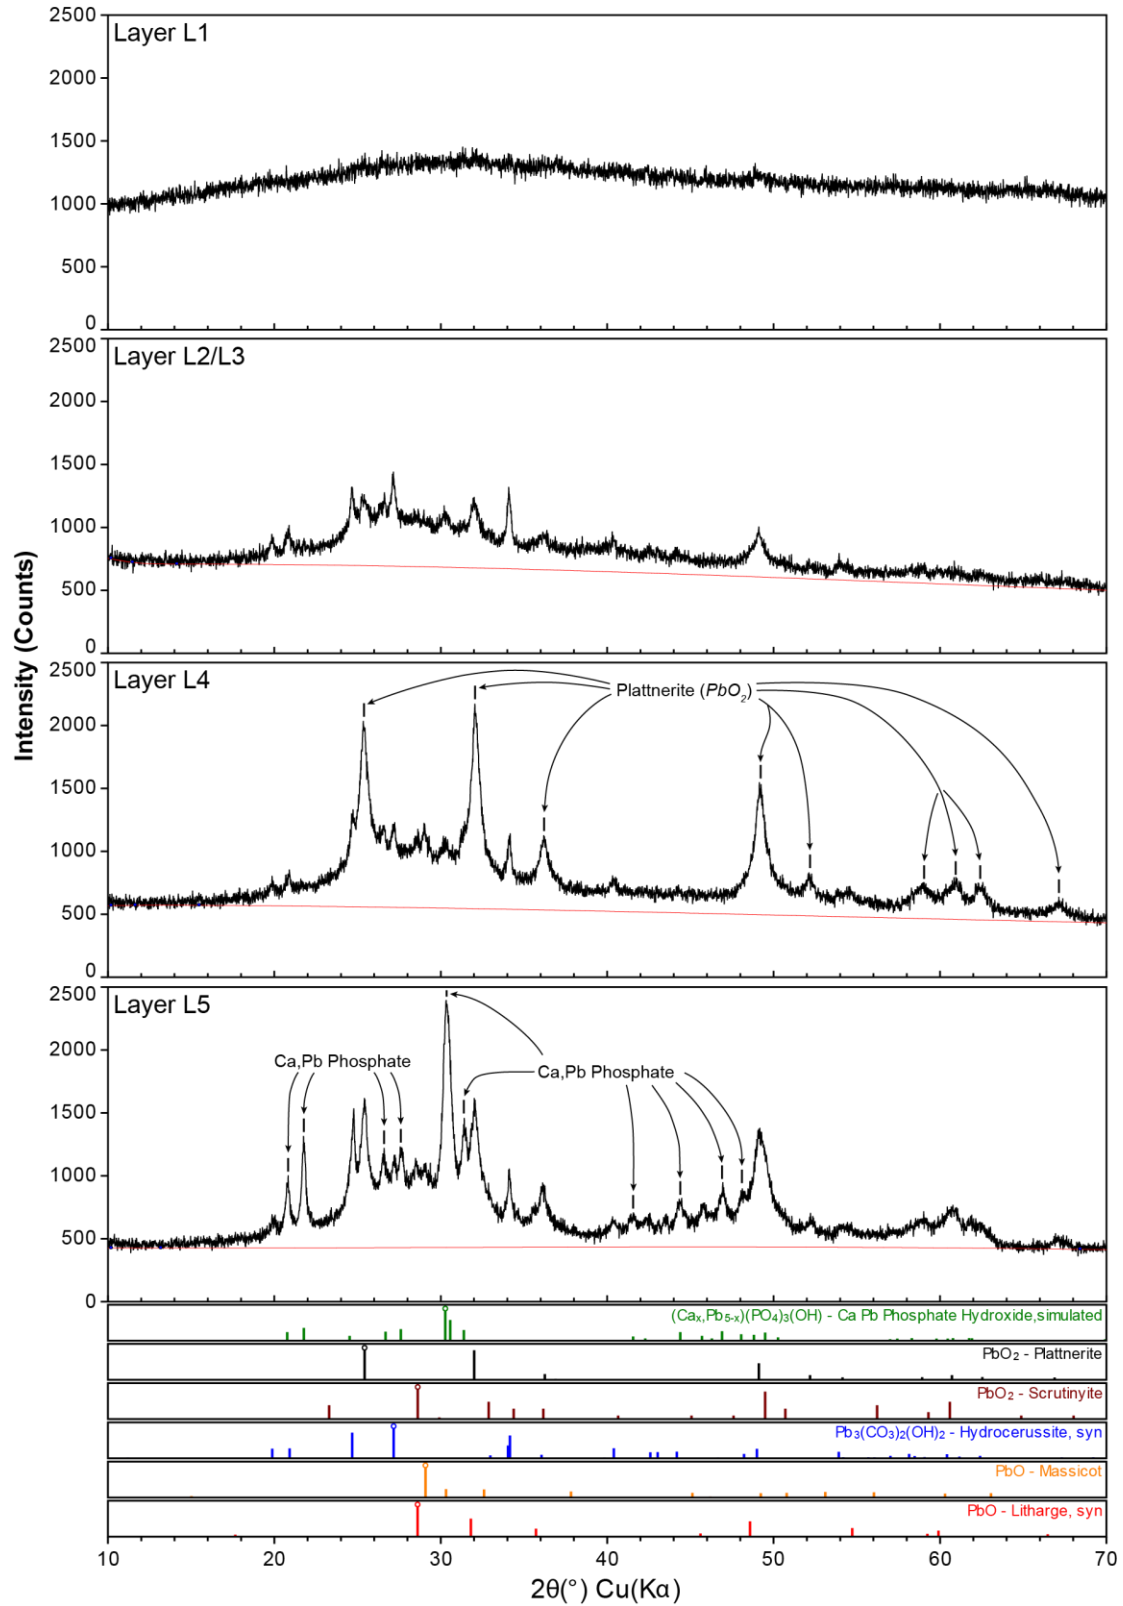



**Figure S6.** SEM back scatter detection image with associated elemental maps for the LSL scale from Utility C characterized by PXRD in Figure S5. Scale bar = 250  $\mu\text{m}$ .

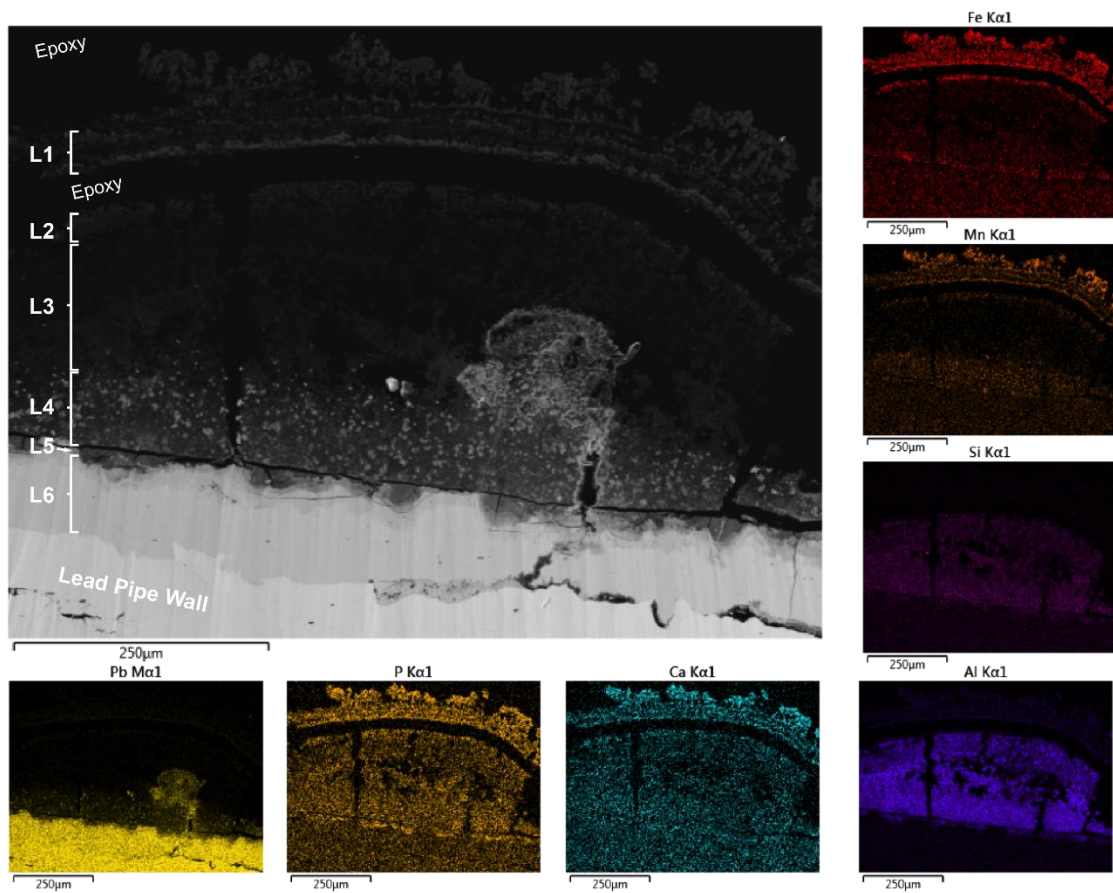

**Figure S7.** Schematic illustrating crystal lattice plane spacings ( $d_1$ ,  $d_2$ ,  $d_3$ ) for A) lead phosphate and B) calcium lead phosphate

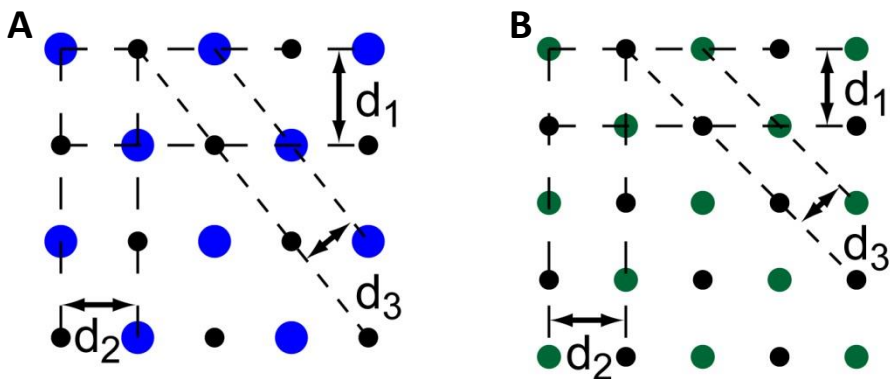

## Methods

The lead service lines (LSLs) were shipped devoid of water, but with their ends sealed to prevent the scales from drying out. Samples were received at US EPA's Andrew W. Breidenbach Environmental Research Center in Cincinnati, Ohio. On receipt the exterior surfaces of the pipes were cleaned with a wire brush and rinsed with de-ionized water. The ends were then uncapped, and the scales dried under ambient air conditions overnight. A bandsaw was used to cut each LSL into approximately 12-inch long sections which were then split longitudinally. Each section was carefully cleaned of lead shavings introduced by the cutting process and representative sections were photographed and set aside for archive. Each section of the LSL was examined, and scale layers were determined based on color and textural details. Once all layers were identified and described a variety of paintbrushes and metal picks were used to harvest each individual scale layer as has been described elsewhere (1-8). Once sampled each layer was crushed and passed through a 75  $\mu\text{m}$  sieve to achieve relative particle size uniformity.

Representative sections of each LSL were selected and the scales were set with Buehler Epo-Heat epoxy resin (Lake Bluff, IL). The resulting epoxied LSLs were trimmed into approximately 1  $\text{cm}^2$  blocks that served as an illustrative example of the scale layers present in each sample. Each block was polished using a JEOL SM09010 cross-section polisher at 5.5 kV for 8 hours. These cross-sections were then analyzed on a JEOL JEM 6490LV scanning electron microscope (SEM) at an accelerating voltage of 15 kV. Energy-Dispersive Spectroscopy (EDS) elemental analysis was performed using an Oxford X-Act analytical drift detector (Oxford Instruments, Concord, MA). The EDS system was calibrated using a 99.9% cobalt reference sample prior to spectra collection as suggested by Oxford Instruments. At the operating accelerating voltage of

15 kV X-ray lines detected included: *Pb Ma<sub>1</sub>*; *O, P, Ca, Fe, Al, and Si Ka<sub>1</sub>*; and *C Ka<sub>1&2</sub>*. C was detected in all scans; however, it is not shown in the line scans or elemental data because the primary signature from the scale is overprinted by C in the epoxy used to stabilize the sample for cutting and polishing. Oxygen was calculated by stoichiometry and the data were normalized to 100%. This standardless elemental analysis was done using the phi(pz) algorithm used by Oxford's INCA software version 18.1 (Concord, MA).

### **LSL Scale Descriptions**

Individual scale layers for each LSL sample are sequentially numbered from the uppermost layer, which is always given the designation of L1 (layer 1) to the lowest layer (ex. L4). L1 represents the scale layer that is in direct contact with flowing drinking water, while the lowest layer identified (highest number) in a pipe is the scale layer immediately next to the lead pipe wall.

#### *Utility A Scale Morphology*

SI Figure 2A represents the scale observed in the LSL from prior to orthophosphate (A\_prePO<sub>4</sub>) from which two layers were sampled. The outermost layer (L1) was approximately 30-50 μm in thickness with a finely crystalline texture that created a relatively even yellowish red (Munsell value 5YR 5/6) coating along the length of the LSL, although there were areas where the coating was cracked and portions of the scale had flaked away revealing a dark reddish brown material underneath (Munsell value 5 YR 3/4). The layer directly against the lead pipe wall (L2) had a very thin surface layer of crystalline reddish black material (Munsell value 5R 2.5/1) which changed to a thicker dusky red crystalline material (Munsell value 5R 3/4). L2 is in total

approximately 125  $\mu\text{m}$  thick and in places contains cracks filled with white (Munsell value N8) to pink (Munsell value 10R 8/3) crystalline material.

The LSL that had been exposed to the phosphate treatment in Utility A (A\_postPO4) is pictured in SI Figure 2B. Four layers were harvested from this pipe. Layer 1 (L1) has a granular, rough bumpy surface texture and ranges in color from light olive brown (2.5 Y 5/3) at the surface to reddish yellow (7.5 YR 6/8) with depth. This layer is up to 100  $\mu\text{m}$  thick and includes some white (N8) crystalline material that seems to extend up from layer 4 (L4). Layer 2 (L2) is finely crystalline and smooth in texture, creating a relatively uniform layer across the entire pipe surface and is dark red (10R 3/6) in color. The white patches and bands identified in L1 are also visible within L2. L3 is a dusky red (10R 3/3) color and is well adhered to the surface of L4. Combined, L2 and L3 are approximately 50  $\mu\text{m}$  thick. The lowest layer is L4 which ranges in color from reddish black (10R 2.5/1) at the surface (L4a) to very dusky red (5R 2.5/4) (L4b) and is around 150-170  $\mu\text{m}$  thick and very well adhered to the lead pipe wall.

#### *Utility B Scale Morphology*

The uppermost scale layer in Area 1 (L1) was identified as a porous friable layer with an uneven surface (B\_area1 L1). Approximately 400-500  $\mu\text{m}$  in thickness this strong brown (Munsell value 7.5 YR 5/8) colored layer was only identified in the region around the wiped joint and as shown in SI Figure 4A and 4B there is a shift in color at the base of L1 to a very pale brown (Munsell value 10 YR 8/4). The surface layer is poorly adhered to layer L2, such that there is a distinct detachment zone between L1 and the underlying material. The middle two layers form a



gradational succession of reddish-brown colored scale with a total thickness of approximately 80  $\mu\text{m}$ . L2 is about 30  $\mu\text{m}$  thick and finely crystalline, L3 is about 50  $\mu\text{m}$  thick with a slightly different color and subtly coarser texture than L2. The lowest layer in Area 1 (L4) is very dusky red in color (Munsell value 2.5 YR 2.5/2). This layer is compact and forms a thin ( $\sim 20$   $\mu\text{m}$ ) hard surface adhered to the lead pipe wall.

The uppermost layer of B\_area2 is starkly different from that in B\_area1. Bearing a white to pinkish white crystalline appearance (Munsell value N8 to 2.5 YR 8/2) consisting mainly of small transparent/translucent platy crystals. L1 is approximately 10-30  $\mu\text{m}$  thick with sporadic patches of pale yellow (Munsell value 2.5 Y 8/13) to reddish yellow irregularly shaped crystals (Munsell value 5 YR 7/8) exposed at the surface (SI Figure 4C and 4D). These patches appear to originate below L2, which is approximately 30  $\mu\text{m}$  thick and comprised of a finely crystalline yellowish red (Munsell value 5YR 4/6) material similar to that of B\_area1 L2 and L3 layers. In places the upper part of layer L2 has sloughed off, leaving a rough, irregularly channeled surface (SI Figure 4C). This disruption of L2 likely preceded or was contemporaneous with the formation of layer L1, as L1 overlies both high and low areas of L2. Layer L3 in sample B\_area2 is identical to L4 from B\_area1.

## References

1. Schock, M. R.; Scheckel, K. G.; DeSantis, M. K.; Gerke, T. L., 2005. Mode of occurrence, treatment and monitoring significance of tetravalent lead, *AWWA Water Quality Technology Conference*; Quebec City, Canada, November 6-10.
2. DeSantis, M. K.; Schock, M. R.; Bennett-Stamper, C., 2012. Incorporation of Phosphate in Destabilized  $\text{PbO}_2$  Scales, *AWWA Water Quality Technology Conference*; Seattle, WA, November 15-19.
3. Desantis, M. K.; Welch, M. M.; Schock, M. R., 2009. Mineralogical evidence of galvanic corrosion in domestic drinking water pipes, *AWWA Water Quality Technology Conference*; Seattle, WA, November 15-19.

4. Schock, M. R.; Cantor, A. F.; Triantafyllidou, S.; Desantis, M. K.; Scheckel, K. G., 2014. Importance of pipe deposits to Lead and Copper Rule compliance. *Journal American Water Works Association*, 106 (7), E336-E349.
5. Schock, M. R.; Lytle, D. A., 2011. *Internal corrosion and deposition control*. 6th ed.; McGraw-Hill, Inc: New York.
6. Desantis, M. K.; Schock, M. R., 2014. Ground truthing the 'Conventional wisdom' of lead corrosion control using mineralogical analysis *AWWA Water Quality Technology Conference*; New Orleans, LA, November 16-20.
7. Triantafyllidou, S.; Schock, M. R.; DeSantis, M. K.; White, C., 2015. Low contribution of PbO<sub>2</sub>-coated lead service lines to water lead contamination at the tap. *Environ Sci Technol*, 49 (6), 3746-3754.
8. Wasserstrom, L. W.; Miller, S. A.; Triantafyllidou, S.; Desantis, M. K.; Schock, M. R., 2017. Scale Formation Under Blended Phosphate Treatment for a Utility With Lead Pipes. *Journal American Water Works Association*, 109 (11), E464-E478.
